# Supplementary material
Source: Elsevier journal article supplement (https://comptes-rendus.academie-sciences.fr/chimie/article/10.1016/j.crci.2009.11.001/file/attach/mmc1.pdf)
Supplement: mmc1 [file mmc1.pdf]

**Synthesis and characterisation of a new templated mixed valence  
titanium(III/IV) phosphate: MIL-131 or  
 $\text{Ti}^{\text{III}}\text{Ti}^{\text{IV}}(\text{OH})\text{F}_4(\text{HPO}_4)(\text{PO}_4)(\text{N}((\text{CH}_2)_2\text{NH}_3)_3)$**

**C. Serre<sup>1\*</sup>, M. Haouas<sup>1</sup>, F. Taulelle<sup>1</sup>, W. Van Beek<sup>2</sup> and G. Férey<sup>1</sup>**

(1) *Institut Lavoisier, UMR CNRS 8637, Université de Versailles-St-Quentin-en-Yvelines, 45 Avenue des Etats-Unis, 78035 Versailles cedex, France*

(2) *ESRF, rue Jules Horowitz, 38043 Grenoble Cedex, France*

(3) *Dipartimento di Scienze e Tecnologia Avanzate, Università del Piemonte Orientale "A. Avogadro", 15100 Alessandria, Italy*

*Email: [serre@chimie.uvsq.fr](mailto:serre@chimie.uvsq.fr)*

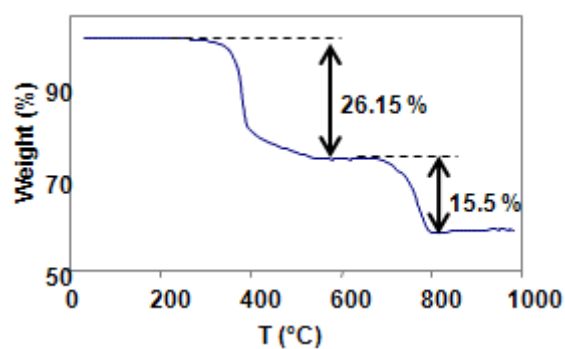

**Figure S1:** TGA of MIL-131 under air atmosphere (heating rate of 3°C/min).

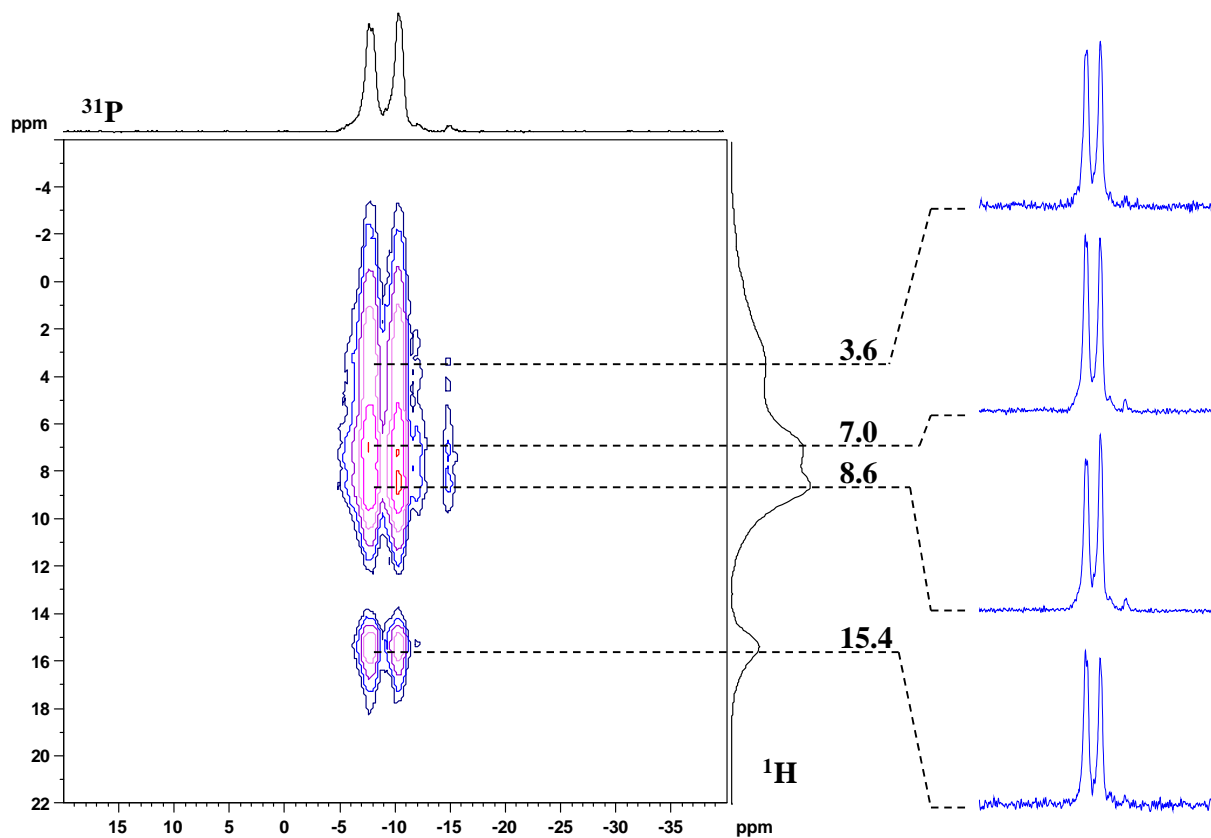

**Figure S2 :**  $^{31}\text{P}\{^1\text{H}\}$  NMR HeteroCorrelation CPMAS spectra of MIL-131. Rotation speed : 30 kHz; contact time : 2 ms.

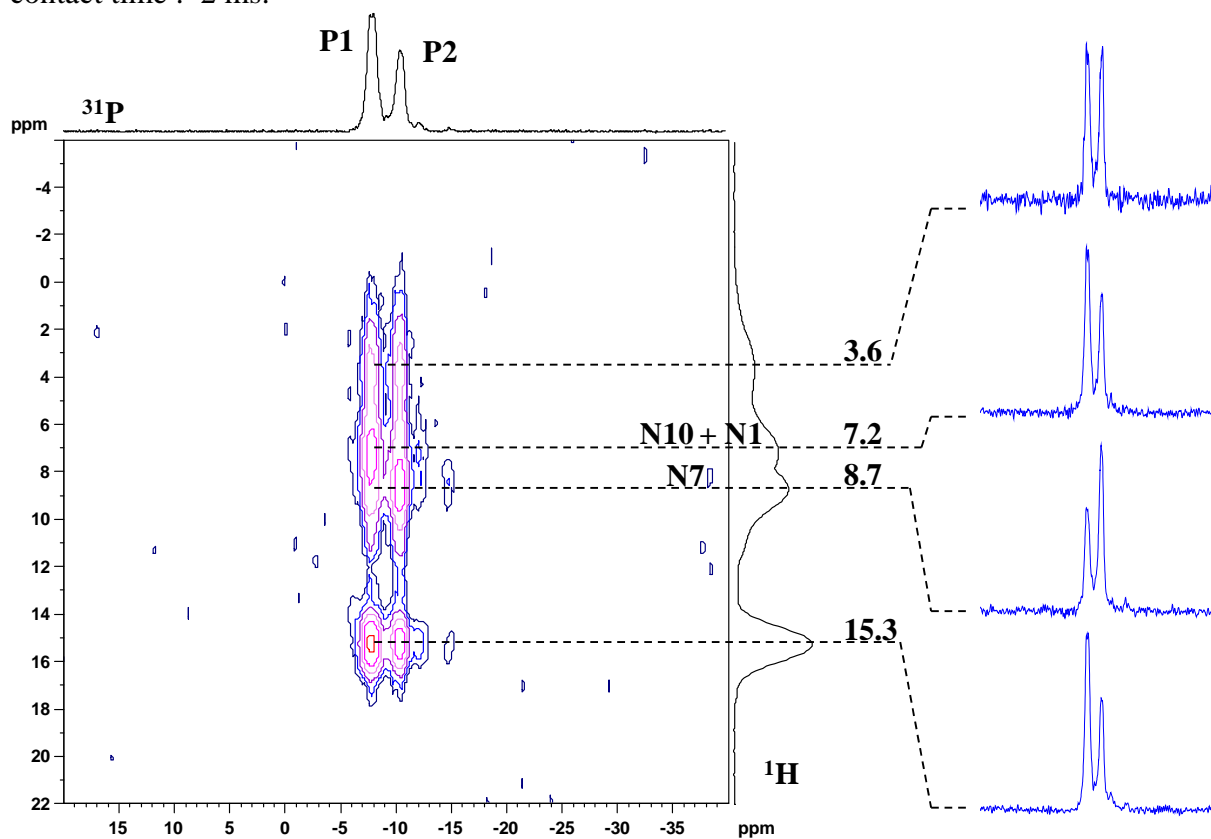

**Figure S3 :**  $^{31}\text{P}\{^1\text{H}\}$  NMR HeteroCorrelation CPMAS spectra of MIL-131. Rotation speed : 30 kHz; contact time : 0.2 ms.

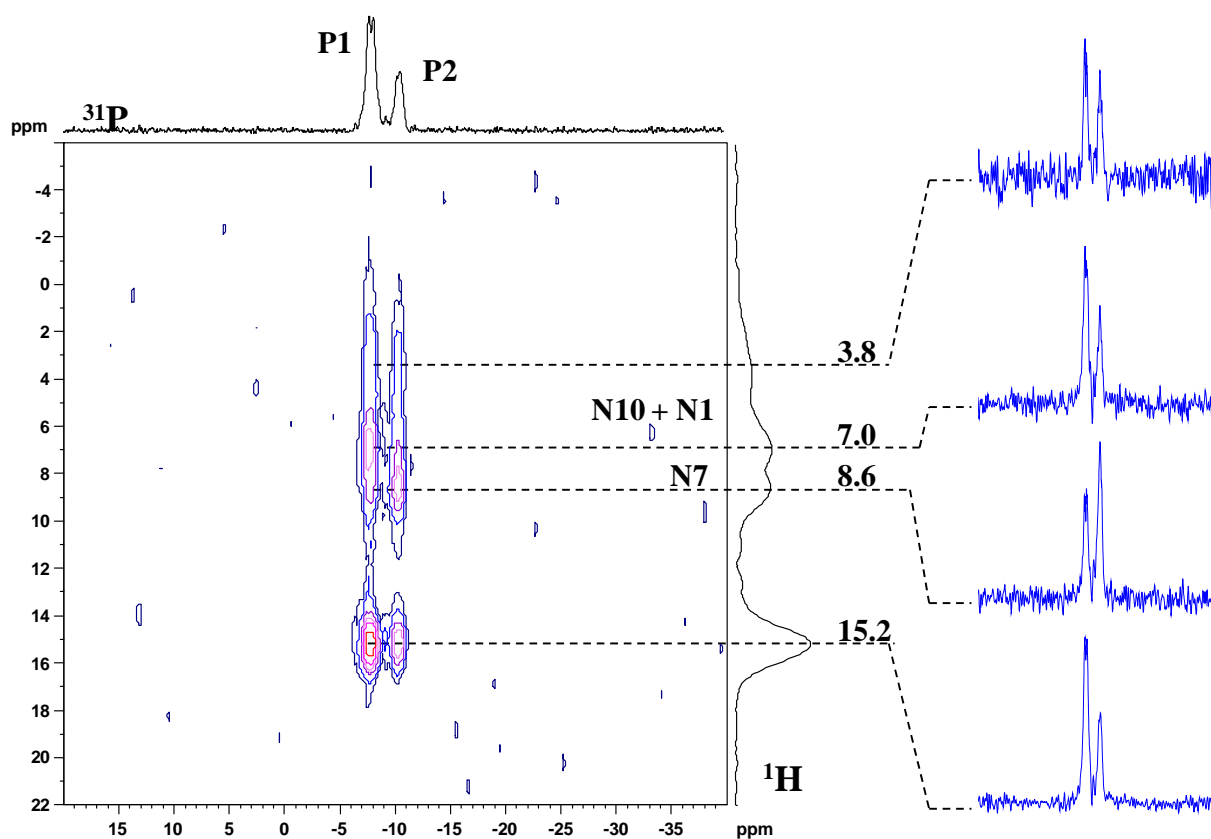

**Figure S4 :**  $^{31}\text{P}\{^1\text{H}\}$  NMR Hetcor CPMAS spectra of MIL-131. Rotation speed : 30 kHz;  
contact time : 0.02 ms.

## References

- (1) Roisnel, T.; Rodriguez-Carvajal, J. In *Abstracts of the 7<sup>th</sup> European Powder Diffraction Conference*, Barcelona, Spain **2000**, 71.
- (2) Favre, V., <http://www.objcryst.sourceforge.net/fox/>
- (3) Rodriguez-Carvajal, J. In *Collected Abstracts of Powder Diffraction Meeting*, Toulouse, France **1990**, 127.
